# Supplementary material for: 3D/2D Bi2S3/SnS2 heterostructures: superior charge separation and enhanced solar light-driven photocatalytic performance
Source: Royal Society of Chemistry journal article supplement (doi:10.1039/d0ce01710h), 2021-01-01
Supplement: d0ce01710h1.pdf [file d0ce01710h1.pdf]

**Electronic supplementary Information:**

**3D/2D Bi<sub>2</sub>S<sub>3</sub>/SnS<sub>2</sub> Heterostructures: Superior Charge Separation and Enhanced Solar Light Driven Photocatalytic Performance**

Sumana Paul<sup>1,3†</sup>, Dulal Barman<sup>1¶†</sup>, Chandra Chowdhury<sup>2</sup>, P. K. Giri<sup>3</sup> and Subodh Kumar De<sup>1\*</sup>

<sup>1</sup>*School of Materials Sciences, Indian Association for the Cultivation of Science, Jadavpur, Kolkata- 700032, India*

<sup>2</sup>*Institute of Catalysis Research and Technology (IKFT), Karlsruhe Institute of Technology (KIT), Eggenstein-Leopoldshafen, Germany.*

<sup>3</sup>*Department of Physics, Indian Institute of Technology Guwahati, Guwahati 781039, India.*

\*E-mail: msskd@iacs.res.in

†Authors Contributed Equally

¶ Present Address: Department of Physics, Balurghat College, Balurghat, Dakshin Dinajpur 733101, India.

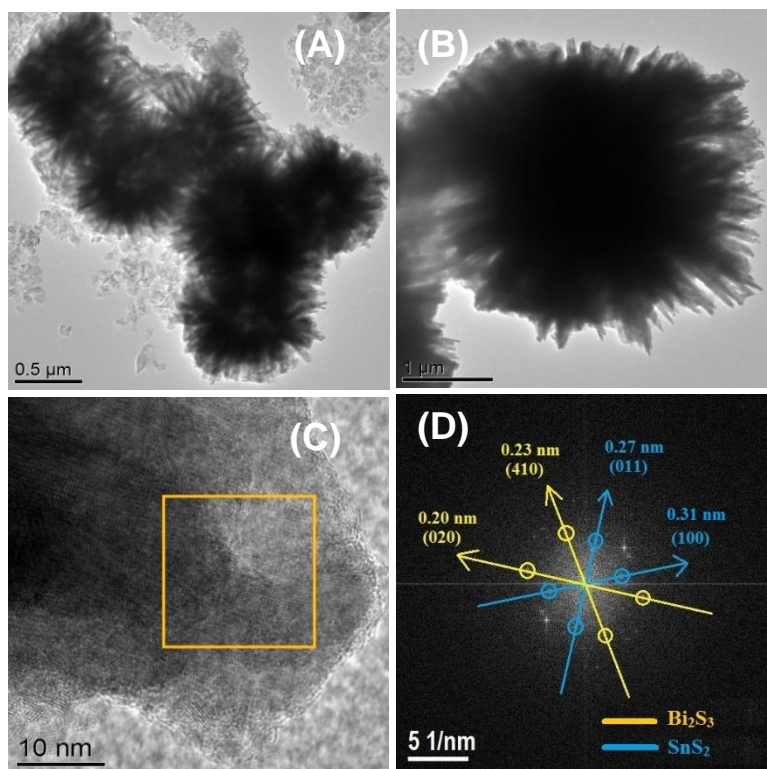

**Fig. S1.** (A) TEM image of BSS2 heterostructure. (B) A closer view of densely SnS<sub>2</sub> decorated Bi<sub>2</sub>S<sub>3</sub> urchin. (C) HRTEM image of a nanorod fully covered with SnS<sub>2</sub> nanosheets. (D) FFT pattern obtained from the yellow square region showing planes of both Bi<sub>2</sub>S<sub>3</sub> and SnS<sub>2</sub> where (011), (210) correspond of planes Bi<sub>2</sub>S<sub>3</sub> and (012), (001) corresponds to planes of SnS<sub>2</sub>.

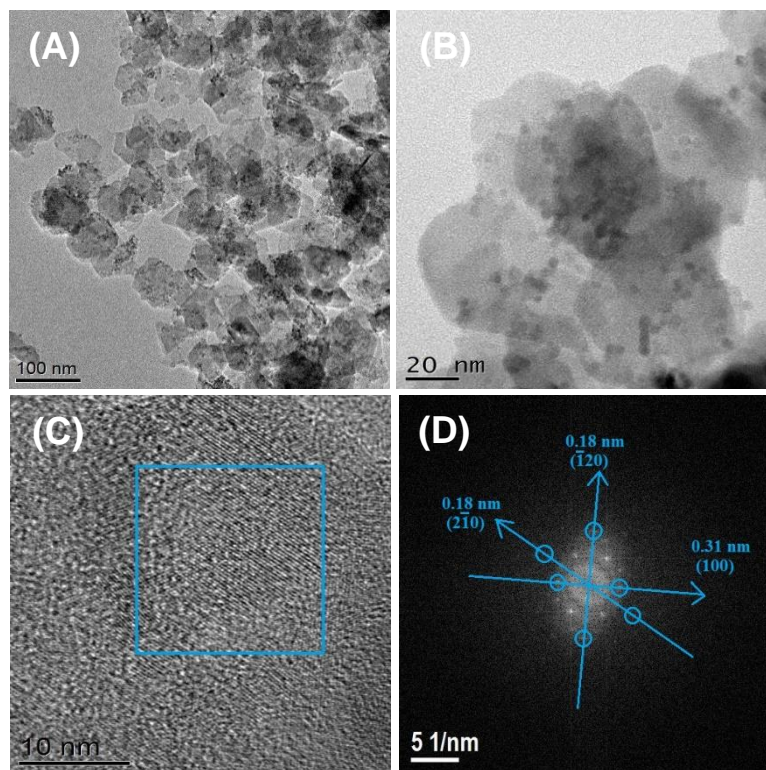

**Fig. S2.** (A) Large area TEM image of SnS<sub>2</sub> nanosheets. (B) A closer view of a few nanosheets. (C) HRTEM image obtained from a single SnS<sub>2</sub> nanosheet. (D) FFT pattern obtained from the blue square region showing the planes (100), (1̄20), (21̄0) of SnS<sub>2</sub>.

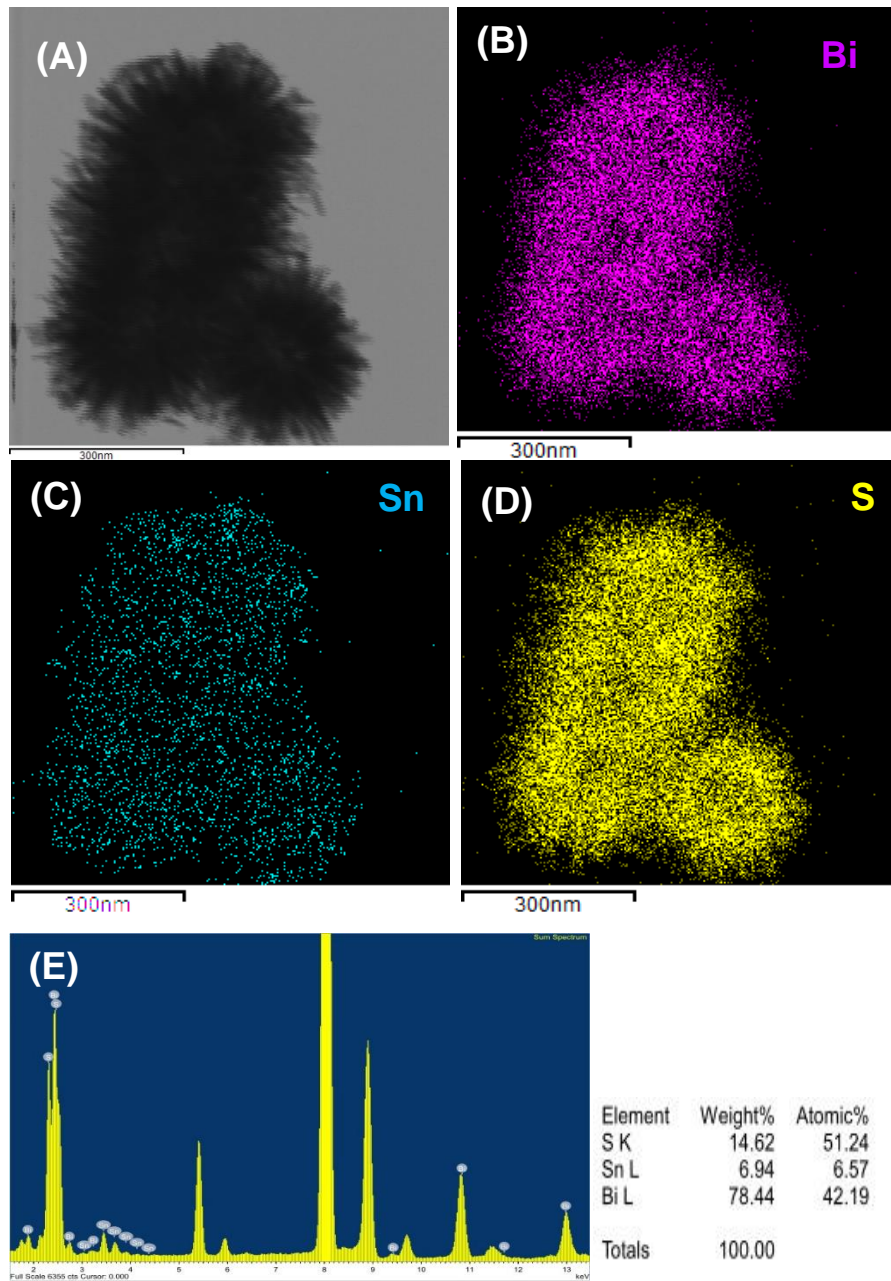

**Fig. S3.** TEM image (A) of the  $\text{Bi}_2\text{S}_3/\text{SnS}_2$  heterostructure (BSS1.5) and the corresponding EDS mapping of Bi (B, magenta), Sn (C, cyan) and S (D, yellow) and (E) the EDS scan.

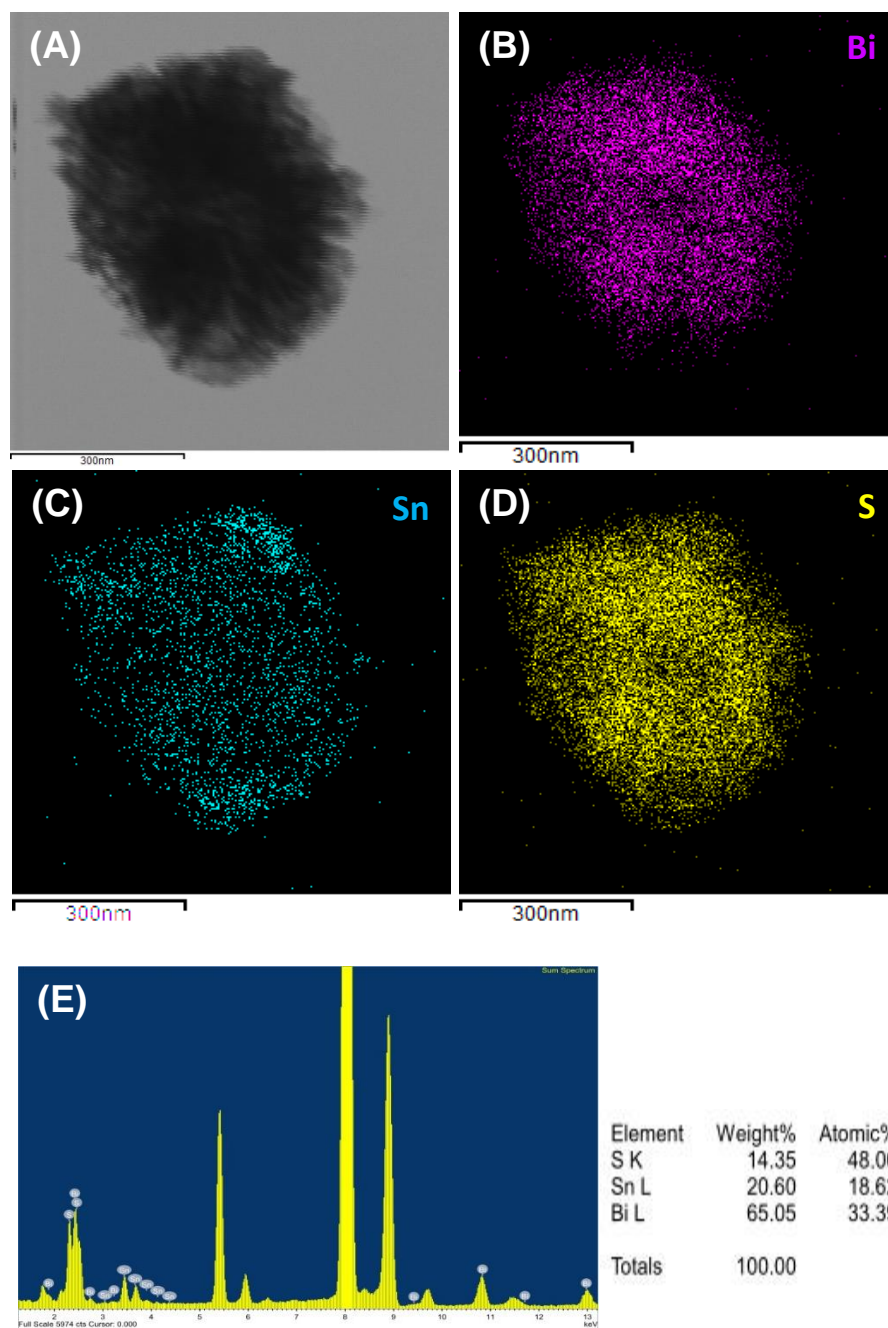

**Fig. S4.** TEM image (A) of the  $\text{Bi}_2\text{S}_3/\text{SnS}_2$  heterostructure (BSS2) and the corresponding EDS mapping of Bi (B, magenta), Sn (C, cyan) and S (D, yellow) and (E) the EDS scan.

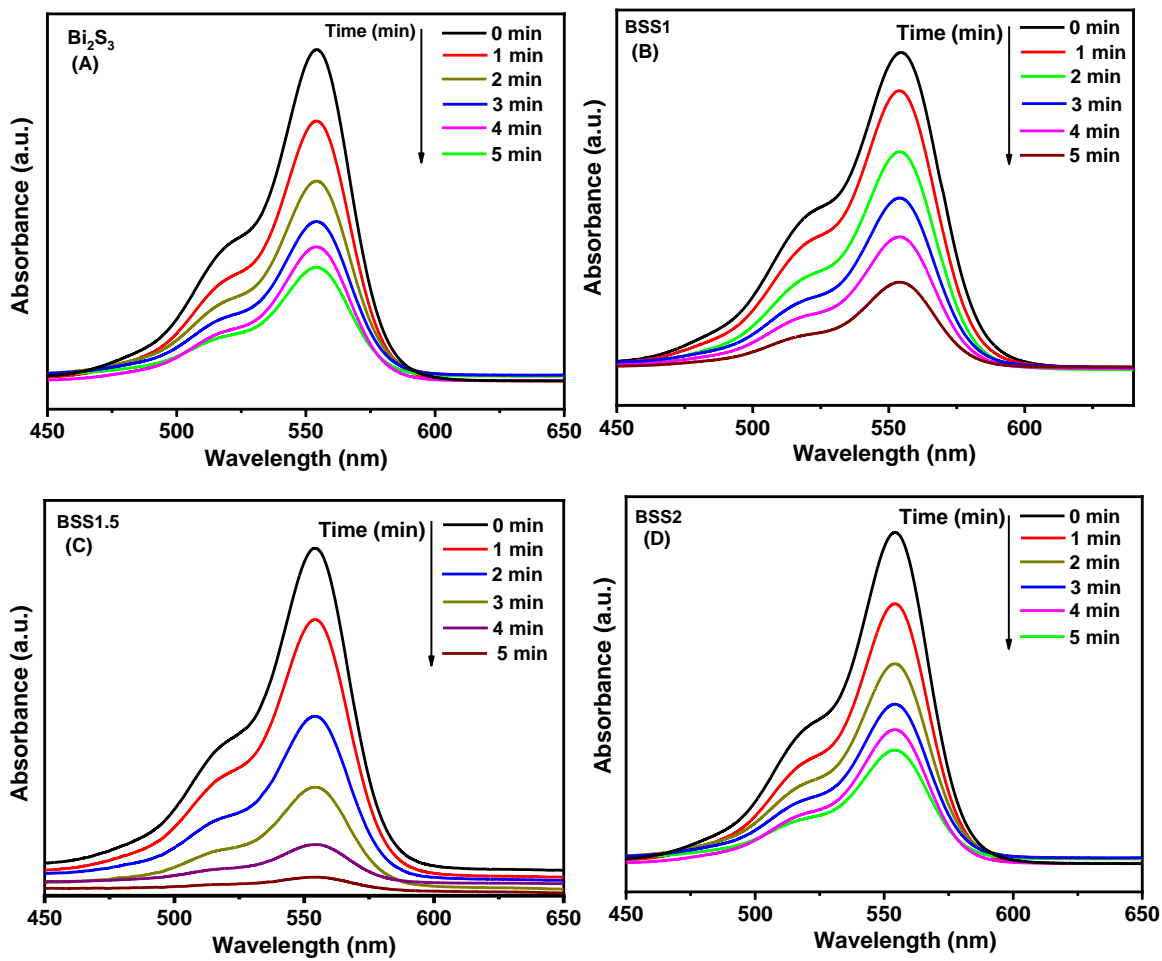

**Fig. S5.** Photocatalytic degradation of RhB dye in presence of (A)  $\text{Bi}_2\text{S}_3$  urchins, (B) BSS1, (C) BSS1.5 and (D) BSS2 heterostructure under solar simulator.

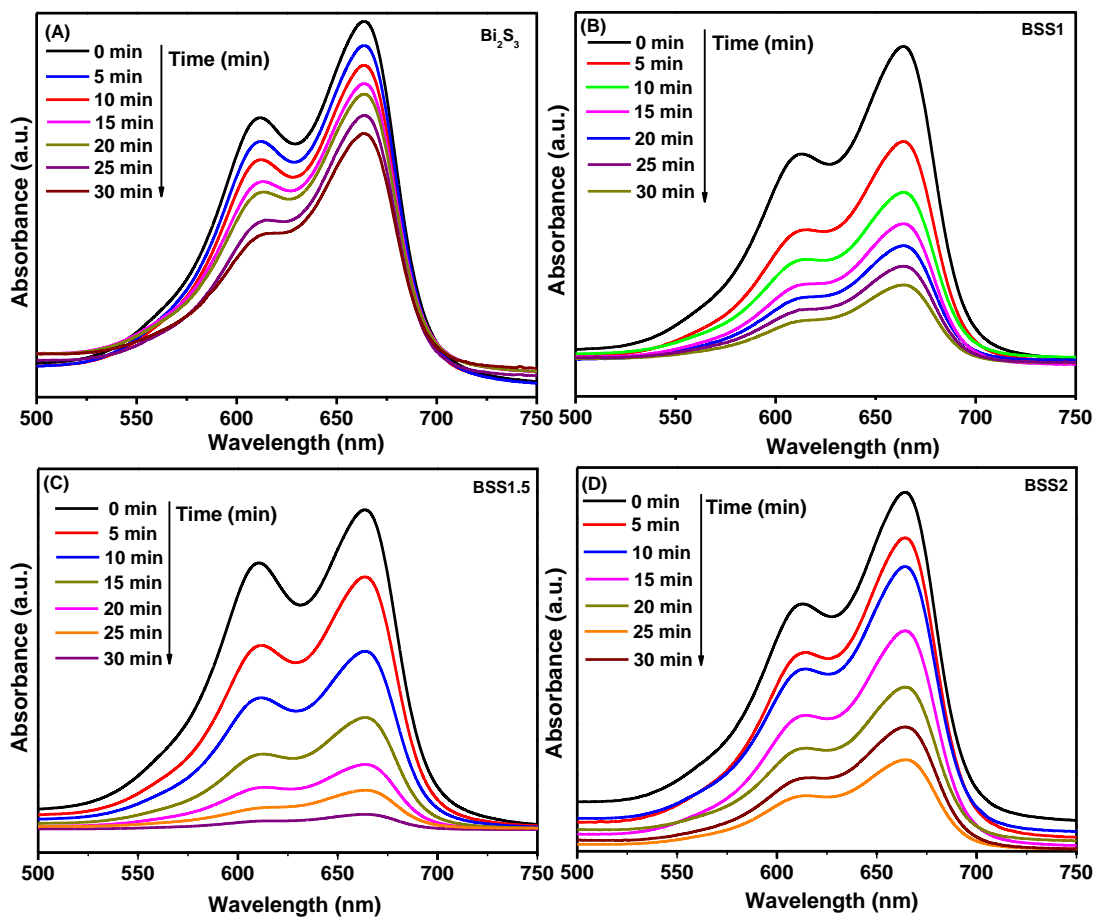

**Fig. S6.** Photocatalytic degradation of MB dye in presence of (A)  $\text{Bi}_2\text{S}_3$  urchins, (B) BSS1, (C) BSS1.5 and (D) BSS2 heterostructures under solar simulator.

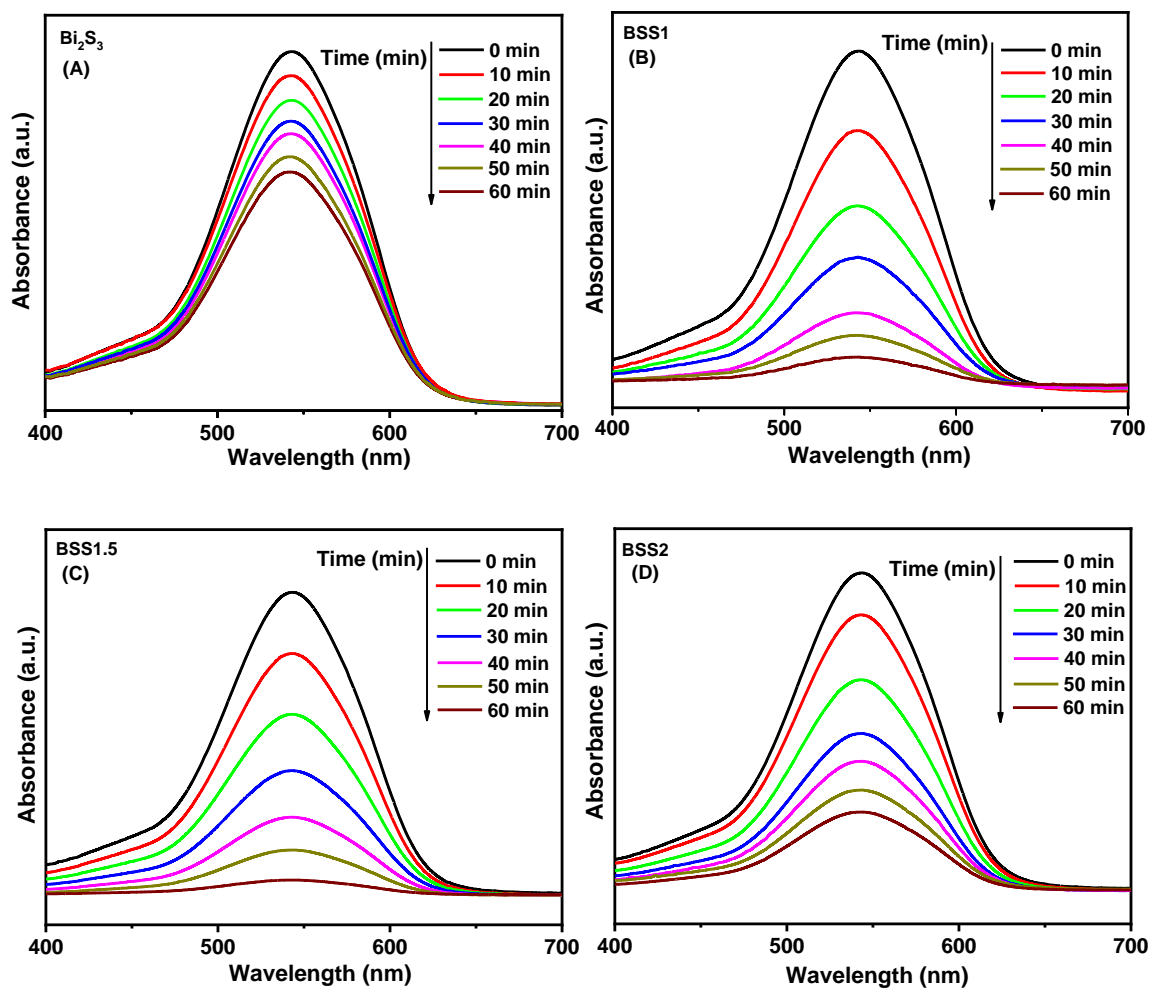

**Fig. S7.** Detection of Cr(VI) in presence of (A) Bi<sub>2</sub>S<sub>3</sub> urchines, (B) BSS1, (C) BSS1.5 and (D) BSS2 heterostructure under solar simulator.



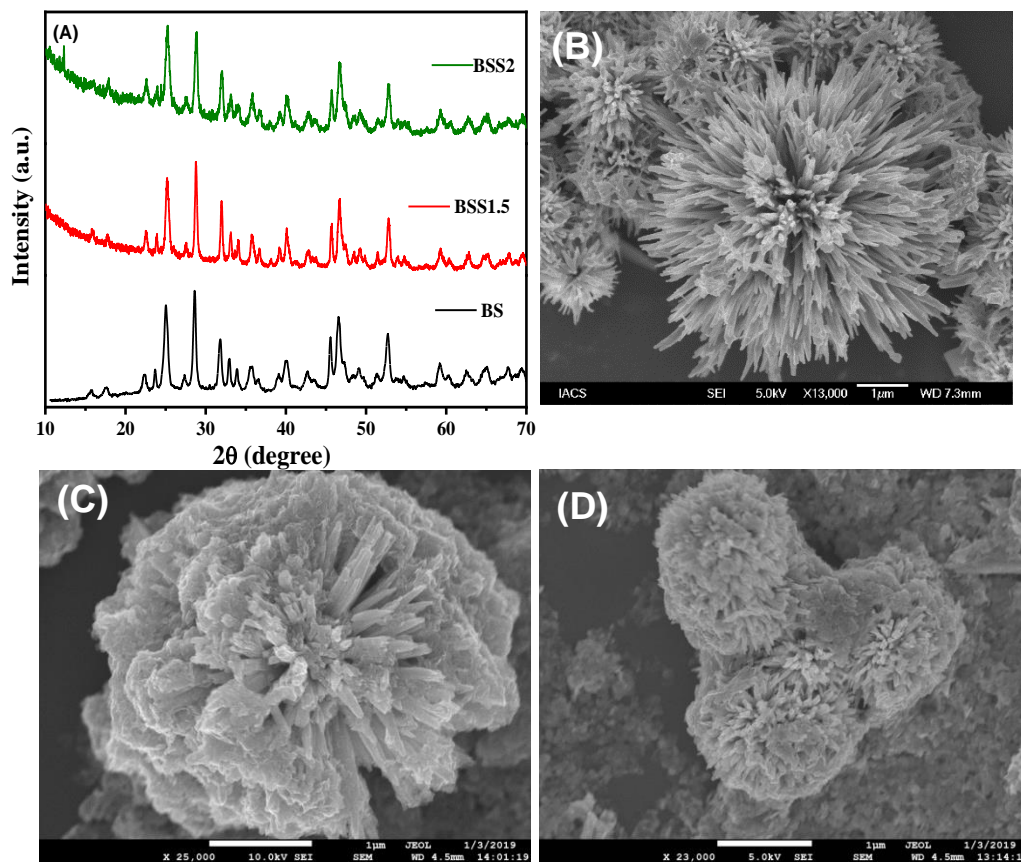

**Fig. S8.** XRD pattern of (A) pure  $\text{Bi}_2\text{S}_3$ , BSS1.5 and BSS2 heterostructures after photocatalytic activity and SEM images of (B) pure  $\text{Bi}_2\text{S}_3$ , (C) BSS1.5 and (D) BSS2 heterostructures after photocatalytic activity.

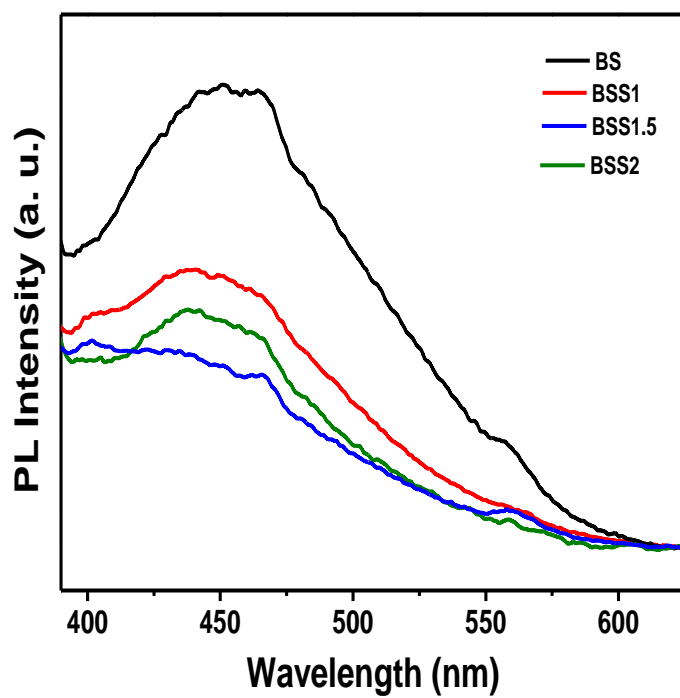

**Fig. S9.** Room temperature PL spectra of different photocatalysts.

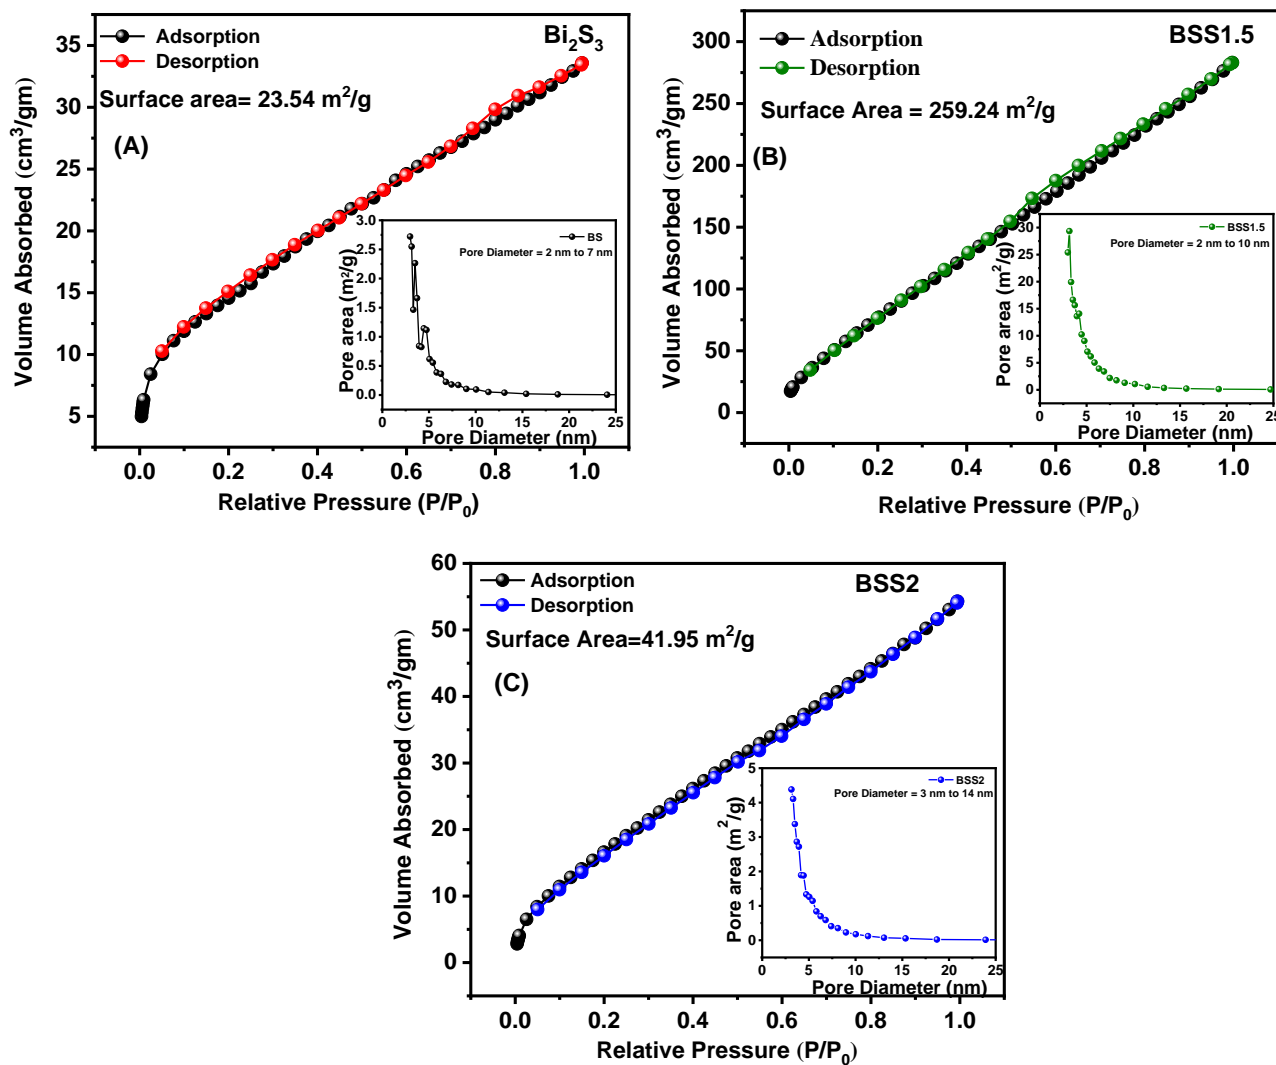

**Fig. S10.** BET adsorption–desorption isotherms and the pore-size distribution (inset) of (A) pure Bi<sub>2</sub>S<sub>3</sub>, (B) BSS1.5 and (C) BSS2 heterostructures.

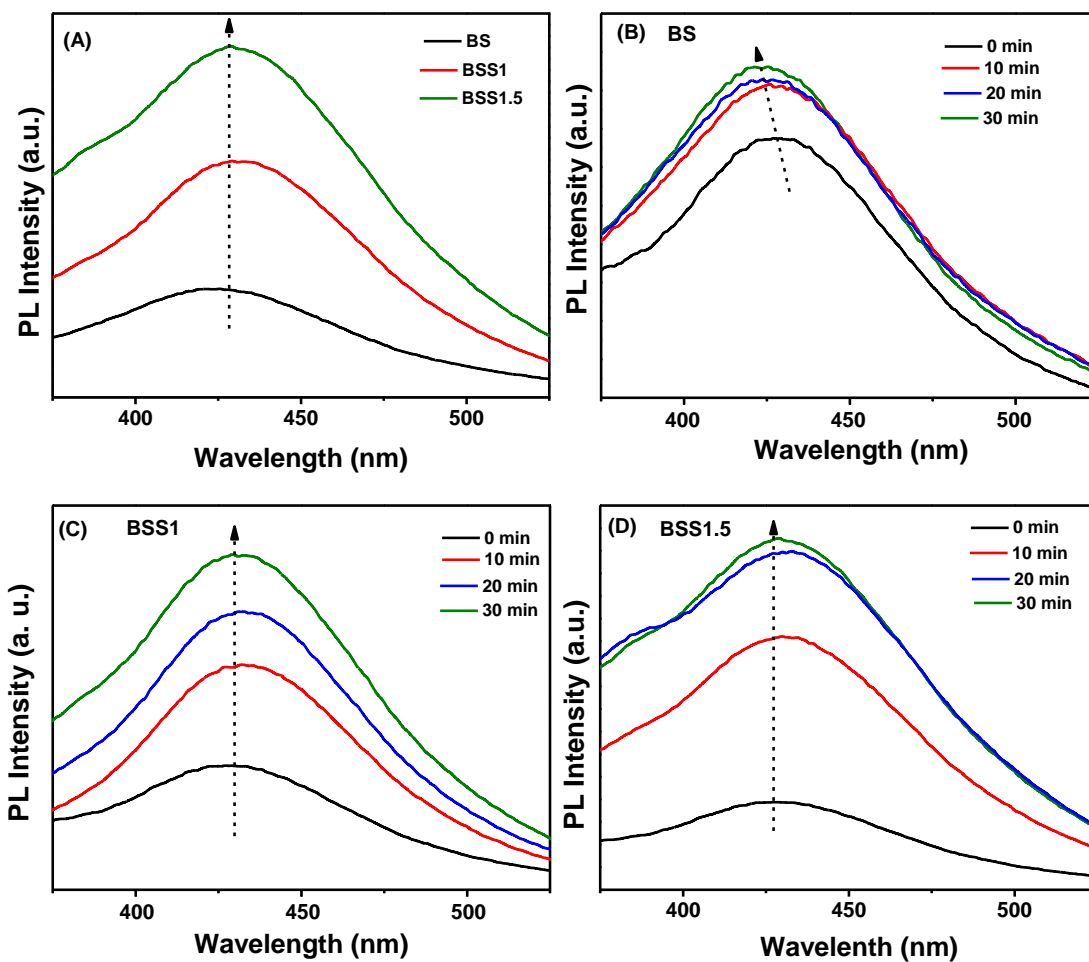

**Fig. S11.** (A) Determination of hydroxyl radicals on the surface of different photocatalysts under solar light irradiation for 30 min using photoluminescence spectra of TAOH ( $\lambda=315$  nm) at 425 nm. Photoluminescence spectra of the solar light irradiated (B) BS, (C) BSS1, (D) BSS1.5 suspensions in terephthalic acid at different irradiation time.

**Table S1:** Relative band position of the Bi<sub>2</sub>S<sub>3</sub> and SnS<sub>2</sub>.

| Semiconductor                  | Electronegativity of the semiconductor (eV) | Optical band gap (eV) | Valance Band Position (eV) |        | Conduction Band Position (eV) (Experiment) |        |
|--------------------------------|---------------------------------------------|-----------------------|----------------------------|--------|--------------------------------------------|--------|
|                                |                                             |                       | Experiment                 | Theory | Experiment                                 | Theory |
| Bi <sub>2</sub> S <sub>3</sub> | 5.28                                        | 1.2                   | 1.38                       | 1.60   | 0.18                                       | 0.12   |
| SnS <sub>2</sub>               | 6.33                                        | 2.48                  | 3.07                       | 2.05   | 0.59                                       | 0.55   |

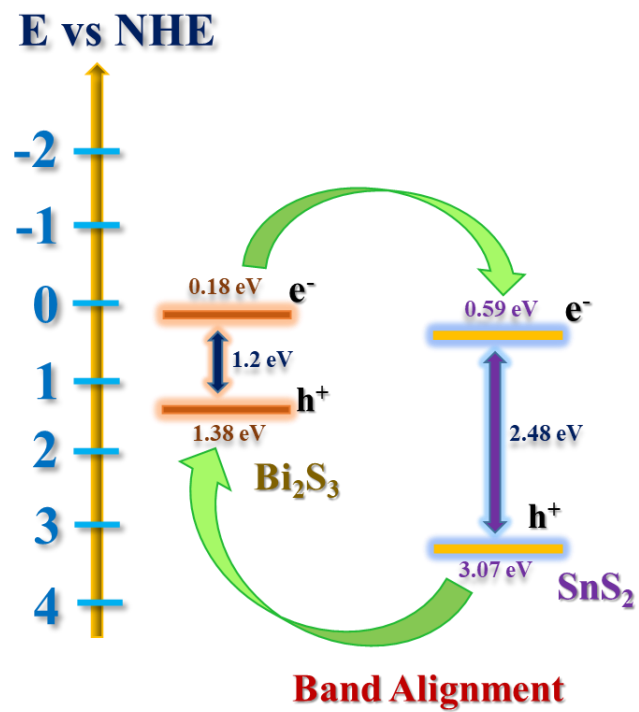

**Scheme 1.** Relative band alignment of Bi<sub>2</sub>S<sub>3</sub> and SnS<sub>2</sub>.
